# Supplementary material for: Population-based bloodstream infection surveillance in rural Thailand, 2007–2014
Source: PubMed Central journal article supplement (PMC6696817; doi:10.1186/s12889-019-6775-4), 2019-05-10

Supplemental Figure 1. Community-onset (CO) BSIs caused by Gram-negative pathogens by month in Sa Kaeo and Nakhon Phanom provinces, Thailand, 2007-2014

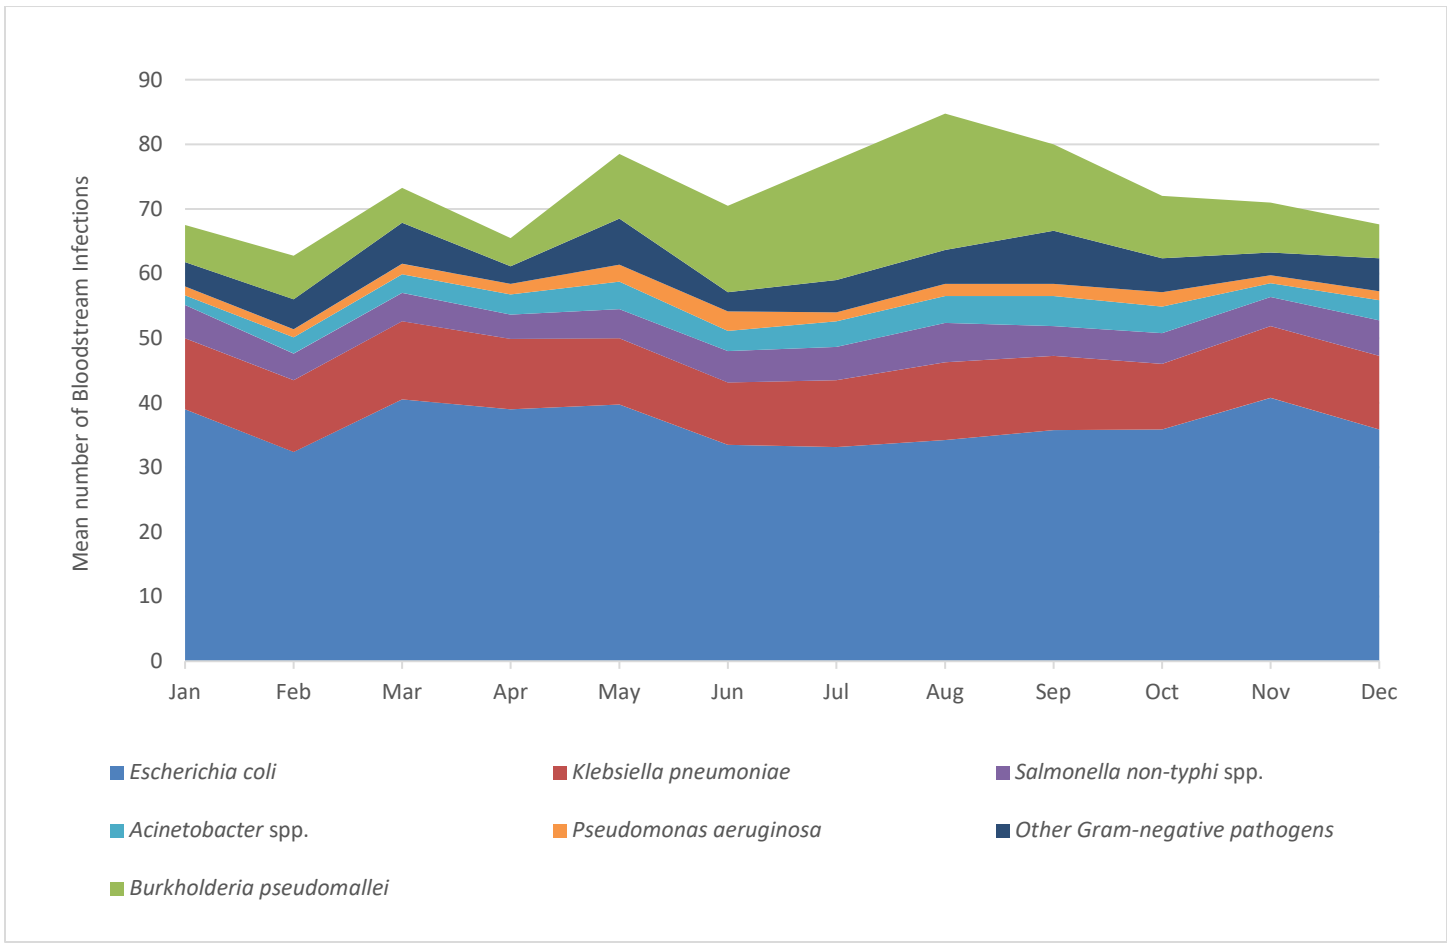

Supplement: 12889_2019_6775_MOESM1_ESM.pdf [file 12889_2019_6775_MOESM1_ESM.pdf]
